# Supplementary material for: Reproducibility of Gene Expression Signatures in Diffuse Large B-Cell Lymphoma
Source: MDPI journal article supplement (doi:10.3390/cancers14051346), 2022-03-05
Supplement: s1 [file s1]

# Supplementary Materials: Reproducibility of gene expression signatures in diffuse large B-cell lymphoma

Jessica Rodrigues Plaça, Arjan Diepstra, Tjitske Los, Matías Mendeve, Annika Seitz, Pieterella J. Lugtenburg, Josée Zijlstra, King Lam, Wilson Araújo da Silva Jr, Bauke Ylstra, Daphne de Jong, Anke van den Berg and Marcel Nijland

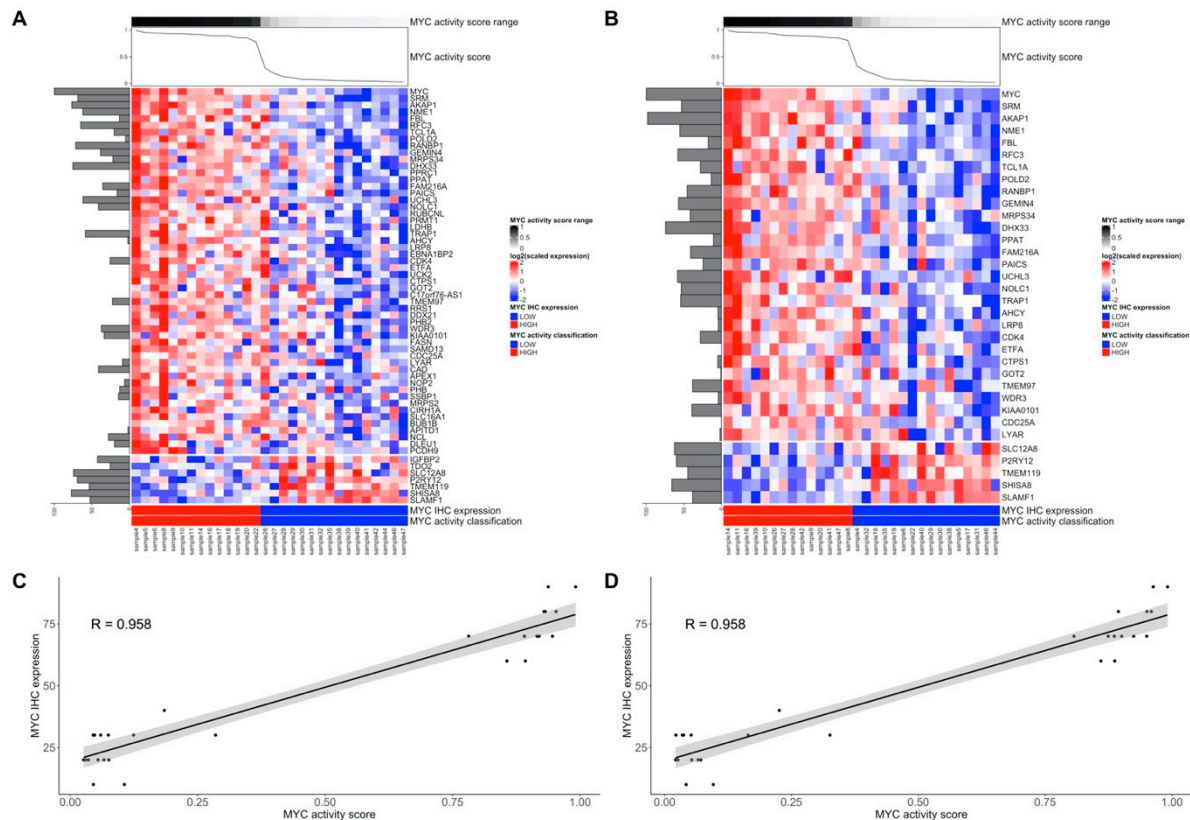

**Figure S1.** MYC activity classifier for the original Carey training cohort. (a) Heatmap with relative expression levels of the 61 genes including the relative contribution of each gene to the classifier (horizontal, shaded bar graph) and the MYC activity score (line graph). (b) Heatmap with relative expression levels of the 27 genes selected for our study including the relative contribution of each gene to the classifier (horizontal, shaded bar graph) and the MYC activity score (line graph). (c) Spearman's correlation between MYC activity score and MYC IHC expression for the 30 samples of the Carey training cohort considering 61 genes in the model. (d) Spearman's correlation between MYC activity score and MYC IHC expression for the 30 samples of the Carey training cohort considering 45 genes in the model. The selected set of 45 genes recapitulates the original MYC activity clusters.

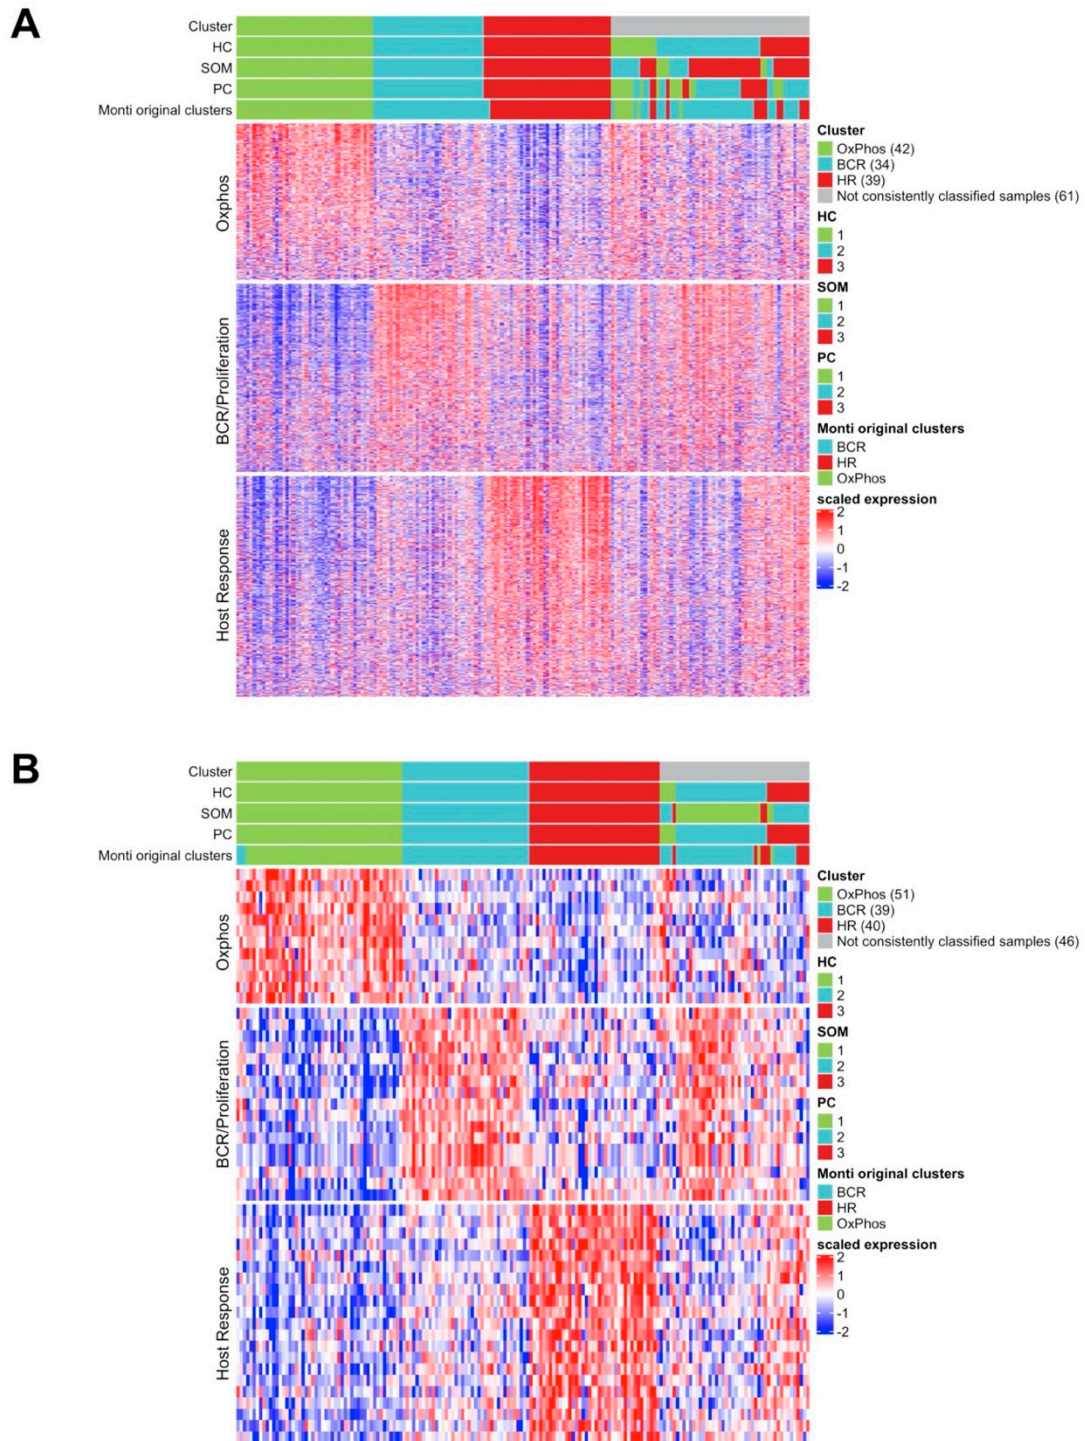

**Figure S2.** Consensus clusters in original Monti cohort. **(a)** Heatmap indicating the three identified clusters applying our algorithm using all 2118 Monti probes. The upper bars represent the classification of the meta-consensus clusters, hierarchical clustering (HC) only, self-organized maps (SOM) only, probabilistic clustering (PC) only and the original Monti defined clusters, respectively. Two samples were misclassified comparing the meta-consensus clusters to the original Monti classes **(b)** Heatmap indicating the three identified clusters applying our algorithm using the 50 selected probes. The upper bars represent the samples classification of the meta-consensus clusters, hierarchical clustering (HC) only, self-organized maps (SOM) only, probabilistic clustering (PC) only and the original Monti defined clusters, respectively. Three samples were misclassified comparing the meta-consensus clusters to the original Monti classes.

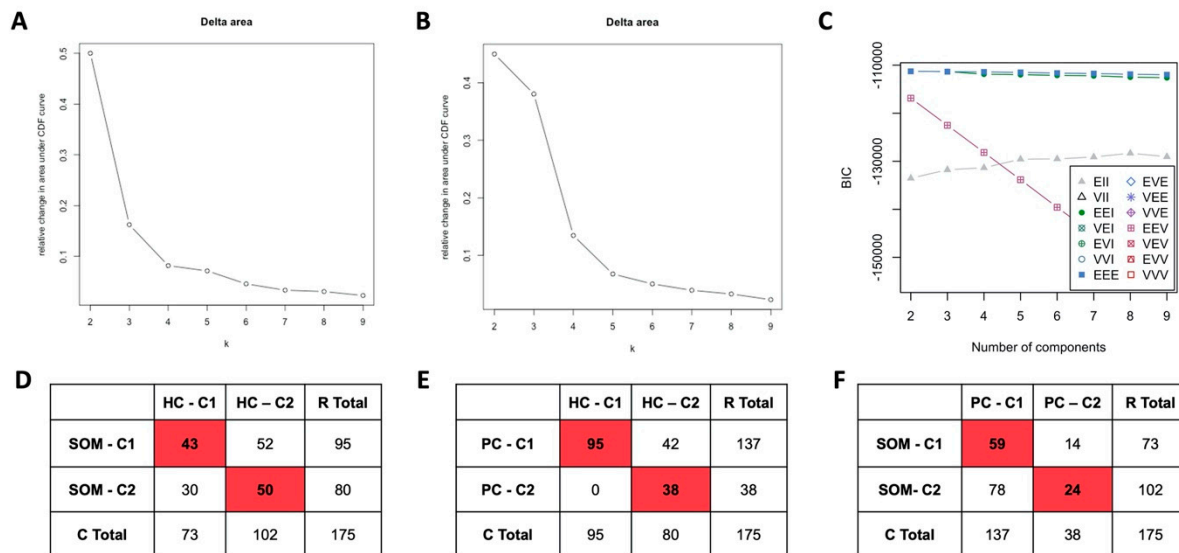

**Figure S3.** Identification of consensus clusters in the HOVON-84 cohort using 47 selected genes following the approach as published by Monti. (A) Relative change in area under CDF curve for HC algorithm for k from 2 to 9 with 175 samples. (B) Relative change in area under CDF curve for SOM algorithm for k from 2 to 9 with 175 samples. (C) BIC for PC algorithm for k from 2 to 9 with 175 samples. (D) Contingency table between clusters identified by HC and SOM algorithms. (E) Contingency table between clusters identified by HC and PC algorithms. (F) Contingency table between clusters identified by PC and SOM algorithms. After doing the first step of consensus clustering we tried to re-cluster the non-Host Response subgroup, however the samples didn't differentiate in a new cluster, as in Monti paper.

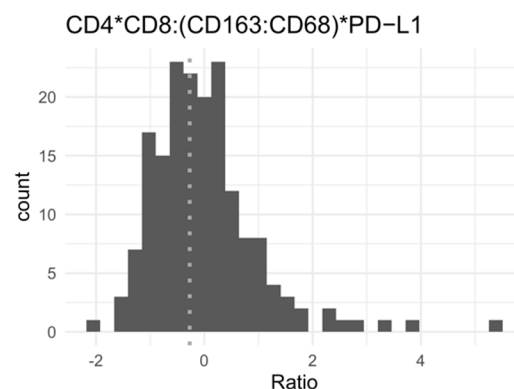

**Figure S4.** Reproduction of the immune ratio. Distribution of the  $CD4*CD8:(CD163:CD68)*PD-L1$  immuno-ratio for HOVON-84 cohort. The grey line indicates the cut-off (-0.278958829) used to stratify OS in the Keane et al., 2015.

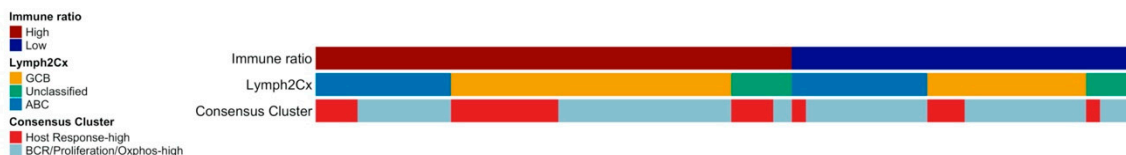

**Figure S5.** Overlap of Immune ratio, Lymph2CX and Consensus Clusters signatures in the HOVON-84 cohort. There is an association between high Immune ratio and high Host Response. No association with Lymph2Cx was found.

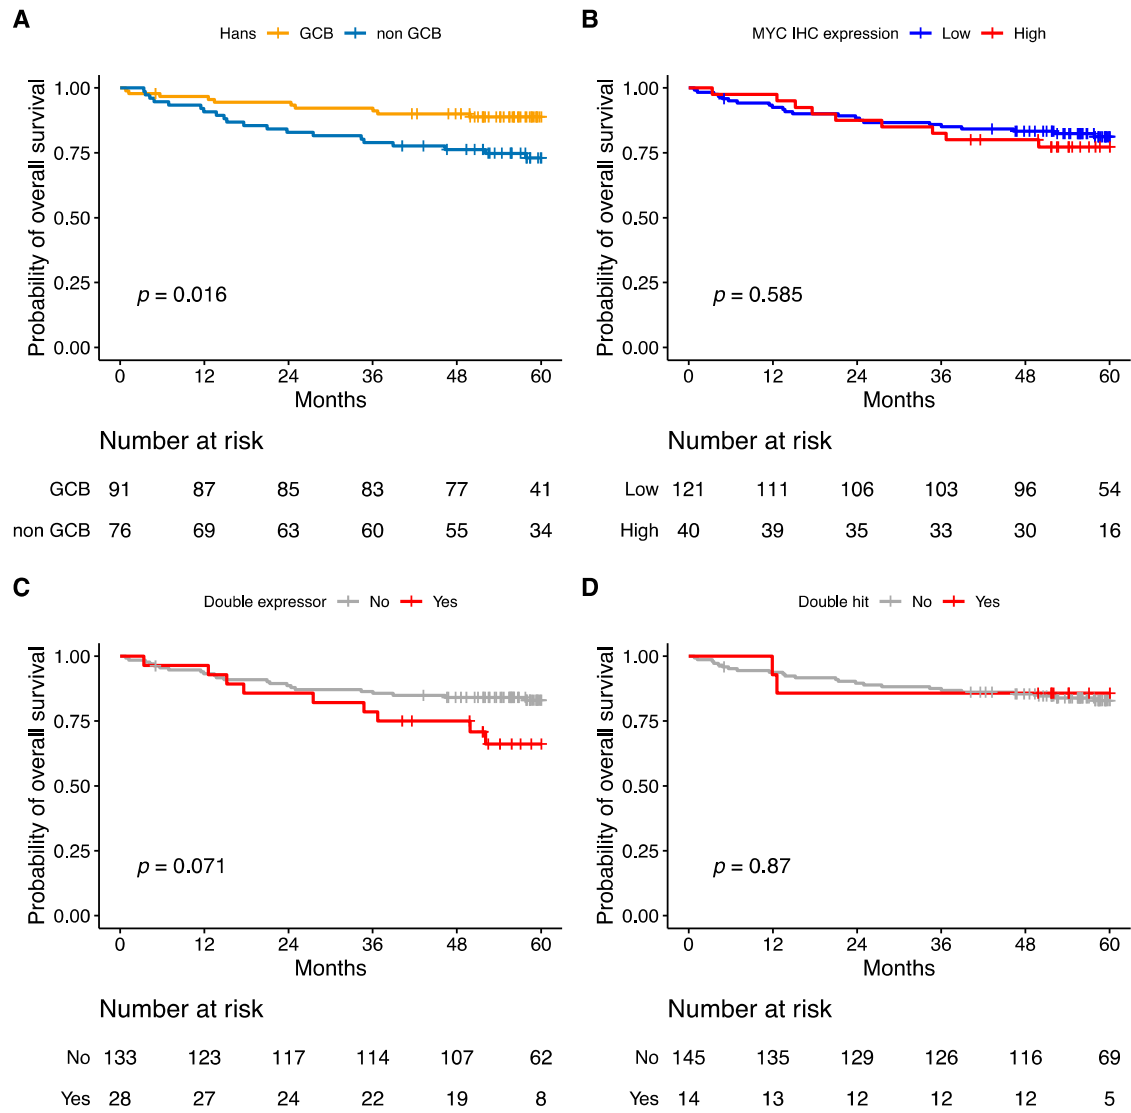

**Figure S6.** Kaplan Meier curves for overall survival of the HOVON-84 cohort for (a) the COO classification defined by Hans. (b) the MYC IHC expression low (<50%) and high (>50%) subgroups. (c) Double expressor lymphoma. (d) Double-hit lymphoma.

**Table S1.** Overview of characteristics of the HOVON-84 and previously published cohorts.

| Characteristic               | HOVON-84<br>(all patients)        | HOVON-84<br>(current study) | Scott et al<br>2014 [1] | Monti et al<br>2005 [2]          | Carey et al<br>2015 [3]     | Keane et al<br>2015 [4] |
|------------------------------|-----------------------------------|-----------------------------|-------------------------|----------------------------------|-----------------------------|-------------------------|
| Patients n                   | 574                               | 175                         | 119                     | 176                              | 70                          | 158                     |
| Prospective                  | Yes                               | Yes                         | No                      | Yes                              | No                          | Yes                     |
| Number of centers            | >10                               | >10                         | 10                      | 1                                | 2                           | 4                       |
| Females n (%)                | 275 (48)                          | 89 (51)                     | 48 (40)                 | 84 (48)                          | 32 (47) – 2 NA              | 66 (42)                 |
| Age≥60 years n (%)           | 396 (69)                          | 116 (66)                    |                         | 112 (64)                         | 38 (56) – 2 NA              | ..                      |
| Stage II n (%)               | 114 (20)                          | 40 (23)                     | 53 (46)                 | 53 (32)                          | ..                          | ..                      |
| Stage III/IV n (%)           | 460 (80)                          | 135 (77)                    | 63 (54) – 3<br>NA       | 115 (68) – 8 NA                  | ..                          | ..                      |
| Extranodal sites >1 n<br>(%) | ..                                | ..                          | 13 (12) – 11<br>NA      | 21 (12) – 2 NA                   | ..                          | ..                      |
| LDH elevated n (%)           | 379 (66)                          | 104 (59)                    | 53 (55) – 22<br>NA      | 81 (56) – 31 NA                  | ..                          | ..                      |
| IPI good risk n (%)          | 246 (43) <sup>aa</sup>            | 84 (48) <sup>aa</sup>       | 71 (66)                 | 82 (57)                          | ..                          | ..                      |
| IPI poor risk n (%)          | 328 (57) <sup>aa</sup>            | 91 (52) <sup>aa</sup>       | 37 (34) – 11<br>NA      | 62 (43) – 32 NA                  | ..                          | 64 (42) – 6 NA          |
| Treatment                    | R-CHOP                            | R-CHOP                      | ..                      | CHOP-based                       | R-CHOP                      | R-CHOP                  |
| OS events n (%)              | 164 (29)                          | 37 (21)                     | ..                      | 76 (43)                          | ..                          | 36 (23)                 |
| COO ABC n (%)                | 151 (38) <sup>a</sup>             | 61 (34)*                    | 49 (41)*                | 24 (18) <sup>b</sup>             | 26 (39) <sup>a</sup>        | 54 (34) <sup>b</sup>    |
| COO GCB n (%)                | 242 (62) <sup>a</sup> – 181<br>NA | 95 (53)*                    | 48 (40)*                | 106 (82) <sup>b</sup> – 46<br>NA | 40 (61) <sup>a</sup> – 4 NA | 104 (66) <sup>b</sup>   |

Percentages were calculated under available data. The number of samples with unavailable data are described with NA.

<sup>aa</sup> Age adjusted IPI. \* COO based on Lymph2Cx algorithm; <sup>a</sup> COO based on Hans algorithm; <sup>b</sup> COO based on Bayesian classifier of 19 genes as previously described by Wright et al. [5]; The treatment is randomized between R-CHOP and RR-CHOP for HOVON-84 cohort with no significant difference between the two groups. NA, not available.

**Table S2.** List of genes used to classify the four GEP using quantification by the Nanostring platform.

| GeneID    | Signature    | GeneID   | Signature            | GeneID   | Signature            |
|-----------|--------------|----------|----------------------|----------|----------------------|
| TNFRSF13B | COO          | PRMT1    | MYC activity         | DDX11    | Consensus clustering |
| LIMD1     | COO          | LDHB     | MYC activity         | UBA1     | Consensus clustering |
| IRF4      | COO          | TRAP1    | MYC activity         | PLCG2    | Consensus clustering |
| CREB3L2   | COO          | AHCY     | MYC activity         | CD22     | Consensus clustering |
| PIM2      | COO          | LRP8     | MYC activity         | SIPA1L3  | Consensus clustering |
| CYB5R2    | COO          | EBNA1BP2 | MYC activity         | CD79A    | Consensus clustering |
| RAB29     | COO          | CDK4     | MYC activity         | CD37     | Consensus clustering |
| CCDC50    | COO          | ETFA     | MYC activity         | PMS2P9   | Consensus clustering |
| R3HDM1    | COO          | UCK2     | MYC activity         | PAX5     | Consensus clustering |
| WDR55     | COO          | CTPS1    | MYC activity         | PMS2P2   | Consensus clustering |
| ISY1      | COO          | GOT2     | MYC activity         | EZR      | Consensus clustering |
| UBXN4     | COO          | TMEM97   | MYC activity         | MAP4K1   | Consensus clustering |
| TRIM56    | COO          | RRS1     | MYC activity         | INPP5D   | Consensus clustering |
| MME       | COO          | DDX21    | MYC activity         | LAMP1    | Consensus clustering |
| SERPINA9  | COO          | PHB2     | MYC activity         | TNFRSF1A | Consensus clustering |
| ASB13     | COO          | WDR3     | MYC activity         | SELPLG   | Consensus clustering |
| MAML3     | COO          | KIAA0101 | MYC activity         | CTSB     | Consensus clustering |
| ITPKB     | COO          | FASN     | MYC activity         | IFITM1   | Consensus clustering |
| MYBL1     | COO          | SAMD13   | MYC activity         | GATA3    | Consensus clustering |
| S1PR2     | COO          | CDC25A   | MYC activity         | MAF      | Consensus clustering |
| MYC       | MYC activity | LYAR     | MYC activity         | SLAMF8   | Consensus clustering |
| SRM       | MYC activity | SLC12A8  | MYC activity         | SERPING1 | Consensus clustering |
| AKAP1     | MYC activity | P2RY12   | MYC activity         | TCIRG1   | Consensus clustering |
| NME1      | MYC activity | TMEM119  | MYC activity         | IL6R     | Consensus clustering |
| FBL       | MYC activity | SHISA8   | MYC activity         | CD2      | Consensus clustering |
| RFC3      | MYC activity | SLAMF1   | MYC activity         | TNFSF13  | Consensus clustering |
| TCL1A     | MYC activity | COX7A2L  | Consensus clustering | CD3E     | Consensus clustering |
| POLD2     | MYC activity | PSMA6    | Consensus clustering | DAB2     | Consensus clustering |
| RANBP1    | MYC activity | RPLP0    | Consensus clustering | CD6      | Consensus clustering |
| GEMIN4    | MYC activity | MRPL3    | Consensus clustering | IRF1     | Consensus clustering |
| MRPS34    | MYC activity | NDUFB1   | Consensus clustering | MAFB     | Consensus clustering |
| DHX33     | MYC activity | ATRAID   | Consensus clustering | ITGB2    | Consensus clustering |
| PPRC1     | MYC activity | PSMA5    | Consensus clustering | CXCL12   | Consensus clustering |
| PPAT      | MYC activity | PSMA2    | Consensus clustering | GRN      | Consensus clustering |
| FAM216A   | MYC activity | SOD1     | Consensus clustering | CD4      | Immune ratio         |
| PAICS     | MYC activity | MRPL15   | Consensus clustering | CD8      | Immune ratio         |
| UCHL3     | MYC activity | DBI      | Consensus clustering | CD163    | Immune ratio         |
| NOLC1     | MYC activity | XRCC5    | Consensus clustering | CD68     | Immune ratio         |
| RUBCNL    | MYC activity | MKI67    | Consensus clustering | PDL1     | Immune ratio         |

**Table S3.** Comparison of cell of origin (COO) allocation between COO classifier and Hans' algorithm.

| Lymph2Cx (GEP)     | N  | IHC Sensitivity | IHC Specificity | IHC PPV | IHC NPV | Hans's Non-GCB (n = 76) | Hans's GCB (n = 91) | Hans's Not scored (n = 8) |
|--------------------|----|-----------------|-----------------|---------|---------|-------------------------|---------------------|---------------------------|
| ABC (33%)          | 58 | 91%             | 84%             | 78%     | 94%     | 51                      | 5                   | 2                         |
| GCB (54%)          | 94 | 84%             | 84%             | 94%     | 78%     | 14                      | 76                  | 4                         |
| Unclassified (13%) | 23 | ..              | ..              | ..      | ..      | 11                      | 10                  | 2                         |

Unclassified and not scored cases were excluded from calculations. ABC, activated B-cell; GCB, germinal center B-cell; GEP, gene expression profiling; IHC, immunohistochemistry; NPV, negative predictive value; PPV, positive predictive value.

**Table S4.** Performance of MYC activity classifier in the Carey training and HOVON-84 test sets.

| Metric                 | Carey training dataset (30 samples) | HOVON-84 dataset (161 samples) |
|------------------------|-------------------------------------|--------------------------------|
| Accuracy               | 1                                   | 0.65                           |
| Sensitivity*           | 1                                   | 0.65                           |
| Specificity            | 1                                   | 0.65                           |
| PPV                    | 1 (30/30)                           | 0.43 (105/161)                 |
| NPV                    | 1 (0/30)                            | 0.82 (56/161)                  |
| Spearman's correlation | 0.96                                | 0.48                           |

Only cases with matched MYC IHC and MYC activity scores were included. The total number of samples equally and not equally classified in comparison to MYC IHC expression are in parenthesis. \*The sensitivity refers to the ability of the test to identify tumors with high MYC IHC expression (>50%) as having MYC activity score >0.5.

## References:

1. Scott, D.W.; Wright, G.W.; Williams, P.M.; Lih, C.J.; Walsh, W.; Jaffe, E.S.; Rosenwald, A.; Campo, E.; Chan, W.C.; Connors, J.M.; et al. Determining cell-of-origin subtypes of diffuse large B-cell lymphoma using gene expression in formalin-fixed paraffin-embedded tissue. *Blood* **2014**, *123*, 1214–1217. <https://doi.org/10.1182/blood-2013-11-536433>.
2. Monti, S.; Savage, K.J.; Kutok, J.L.; Feuerhake, F.; Kurtin, P.; Mihm, M.; Wu, B.; Pasqualucci, L.; Neuberg, D.; Aguiar, R.C.; et al. Molecular profiling of diffuse large B-cell lymphoma identifies robust subtypes including one characterized by host inflammatory response. *Blood* **2005**, *105*, 1851–1861. <https://doi.org/10.1182/blood-2004-07-2947>.
3. Carey, C.D.; Gusenleitner, D.; Chapuy, B.; Kovach, A.E.; Kluk, M.J.; Sun, H.H.; Crossland, R.E.; Bacon, C.M.; Rand, V.; Dal Cin, P.; et al. Molecular classification of MYC-driven B-cell lymphomas by targeted gene expression profiling of fixed biopsy specimens. *J. Mol. Diagn.* **2015**, *17*, 19–30. <https://doi.org/10.1016/j.jmoldx.2014.08.006>.
4. Keane, C.; Vari, F.; Hertzberg, M.; Cao, K.A.; Green, M.R.; Han, E.; Seymour, J.F.; Hicks, R.J.; Gill, D.; Crooks, P.; et al. Ratios of T-cell immune effectors and checkpoint molecules as prognostic biomarkers in diffuse large B-cell lymphoma: A population-based study. *Lancet Haematol.* **2015**, *2*, e445–e455. [https://doi.org/10.1016/s2352-3026\(15\)00150-7](https://doi.org/10.1016/s2352-3026(15)00150-7).
5. Sehn, L.H.; Berry, B.; Chhanabhai, M.; Fitzgerald, C.; Gill, K.; Hoskins, P.; Klasa, R.; Savage, K.J.; Shenkier, T.; Sutherland, J.; et al. The revised International Prognostic Index (R-IPI) is a better predictor of outcome than the standard IPI for patients with diffuse large B-cell lymphoma treated with R-CHOP. *Blood* **2007**, *109*, 1857–1861. <https://doi.org/10.1182/blood-2006-08-038257>.
